# Supplementary material for: The contact barrier of a 1T′/2H MoS2 heterophase bilayer and its modulation by adatom and strain: a first-principles study
Source: Royal Society of Chemistry journal article supplement (doi:10.1039/d1cp00504a), 2021-01-01
Supplement: d1cp00504a1.pdf [file d1cp00504a1.pdf]

# The contact barrier of 1T'/2H MoS<sub>2</sub> heterophase bilayer and its modulation by adatom and strain: A first-principle study

Jie Sun,<sup>a</sup> Haoyun Dou,<sup>a</sup> Guangping Zhang<sup>b,\*</sup> Jiancai Leng,<sup>a,\*</sup>

<sup>a</sup>School of Electronic and Information Engineering (Department of Physics), Qilu University of Technology (Shandong Academy of Sciences), 250353 Jinan, Shandong, P. R. China

<sup>b</sup>Shandong Key Laboratory of Medical Physics and Image Processing, School of Physics and Electronics, Shandong Normal University, 250358 Jinan, Shandong, P. R. China.

\*Corresponding authors: [zhangguangping@sdu.edu.cn](mailto:zhangguangping@sdu.edu.cn); [jiancaileng@qlu.edu.cn](mailto:jiancaileng@qlu.edu.cn)

## 1. The effective mass of MoS<sub>2</sub> in the related systems.

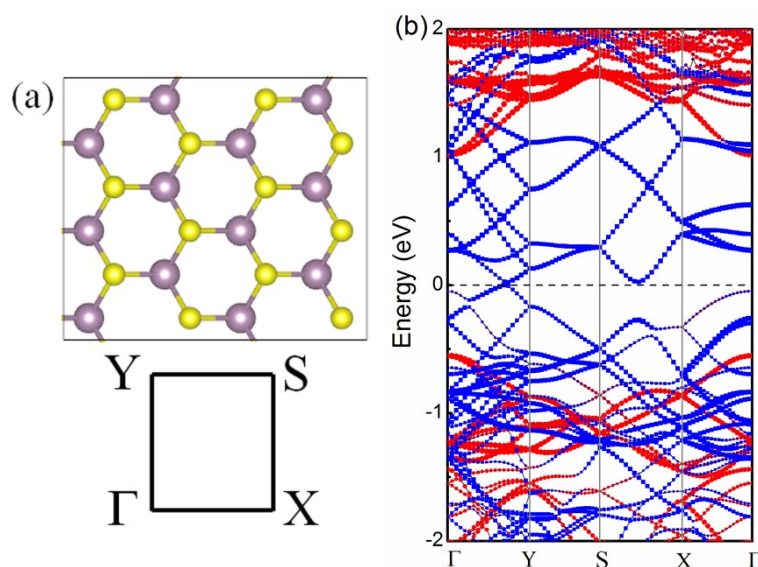

**Figure S1.** (a) 2×3 supercell of 2H-MoS<sub>2</sub> (b) the electronic band structure of 1T'/2H MoS<sub>2</sub>.

**Table S1.** Effective masses of the electron and hole along high symmetry points of each system.

|                         | $\Gamma$ -X          |                      | $\Gamma$ -Y          |                      |
|-------------------------|----------------------|----------------------|----------------------|----------------------|
|                         | $m_e^*$<br>( $m_0$ ) | $m_h^*$<br>( $m_0$ ) | $m_e^*$<br>( $m_0$ ) | $m_h^*$<br>( $m_0$ ) |
| 2H-MoS <sub>2</sub>     | 0.43                 | 0.57                 | 0.48                 | 0.67                 |
| 1T'/2H MoS <sub>2</sub> | 0.45                 | 0.61                 | ×                    | 0.51                 |
| Li                      | 0.47                 | ×                    | ×                    | ×                    |
| Na                      | 0.47                 | ×                    | ×                    | ×                    |
| Mg                      | 0.48                 | ×                    | ×                    | ×                    |
| Al                      | 0.49                 | ×                    | ×                    | ×                    |

The effective mass of MoS<sub>2</sub> in the related systems is evaluated from the band structure  $m^* = \hbar^2 \left( \frac{d^2 E}{dk^2} \right)^{-1}$ . Here, a 2×3 supercell of 2H-MoS<sub>2</sub> and 1T'/2H MoS<sub>2</sub> is adopted as shown in Figure S1 (a). Figure S1 (b) is the corresponding band structure of 1T'/2H MoS<sub>2</sub> system. The effective mass along high symmetry points of each system is given in Table S1. Some values are not given because it is hard to obtain from the projected band structure. We can see from Table S1 that the effective mass of both electrons ( $m_e^*$ ) and holes ( $m_h^*$ ) along  $\Gamma$ -X of MoS<sub>2</sub> in 1T'/2H MoS<sub>2</sub> system are slightly enlarged compared with that in pure 2H-MoS<sub>2</sub> system. However,  $m_h^*$  along  $\Gamma$ -Y of MoS<sub>2</sub> in 1T'/2H MoS<sub>2</sub> system is reduced compared with that in pure 2H-MoS<sub>2</sub> system. As for 1T'/2H MoS<sub>2</sub> system with metal atoms adsorption,  $m_e^*$  along  $\Gamma$ -X of MoS<sub>2</sub> is increased according to order of  $m_e^*(\text{Al}) > m_e^*(\text{Mg}) > m_e^*(\text{Na}) = m_e^*(\text{Li})$ .

**2. The projected band structure of adatoms adsorbed on the top layer of 1T'/2H MoS<sub>2</sub> heterophase bilayer.**

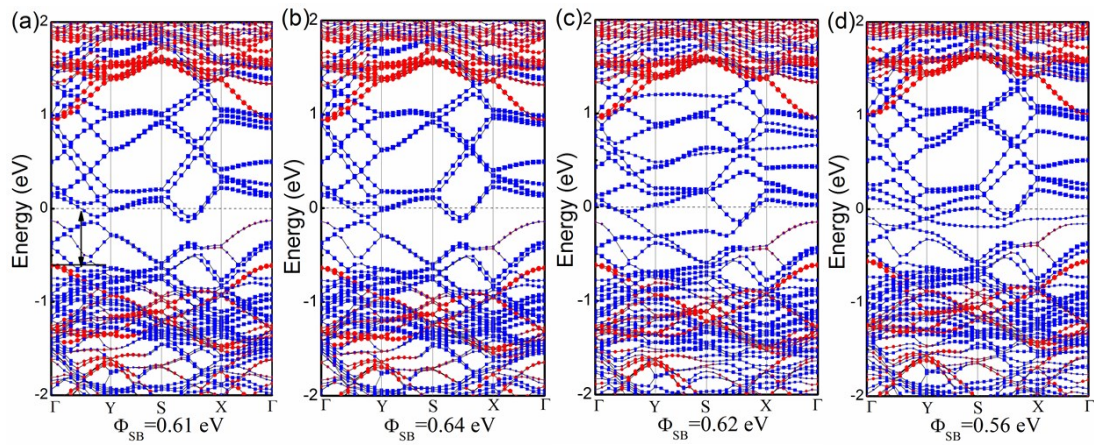

**Figure S2.** The projected band structure of adatoms adsorbed on the top layer of 1T'/2H MoS<sub>2</sub> heterophase bilayer.
